# Supplementary material for: Effects of Sucrose Feeding on the Quality of Royal Jelly Produced by Honeybee Apis mellifera L.
Source: MDPI journal article supplement (doi:10.3390/insects14090742), 2023-09-04
Supplement: s1 [file s1]

**Table S1.** Information on the primers used for qRT-PCR in this experiment.

| Genes | GenBank accession number | Primer sequence (5' - 3')   | Source               |
|-------|--------------------------|-----------------------------|----------------------|
| MRJP1 | GB55205                  | <u>CACAGCCCAAGATGGAATTT</u> | Wu et al., 2017 [39] |
|       |                          | <u>AAGAGGACGCCACTCTTTGA</u> |                      |
| MRJP3 | GB55204                  | <u>ATTGCCGTAAACGCCACTAC</u> |                      |
|       |                          | <u>CAATCGATGGAAGGAATCGT</u> |                      |
