# Supplementary material for: Effects of Sucrose Feeding on the Quality of Royal Jelly Produced by Honeybee Apis mellifera L.
Source: MDPI journal article supplement (doi:10.3390/insects14090742), 2023-09-04
Supplement: s1 [file s1]

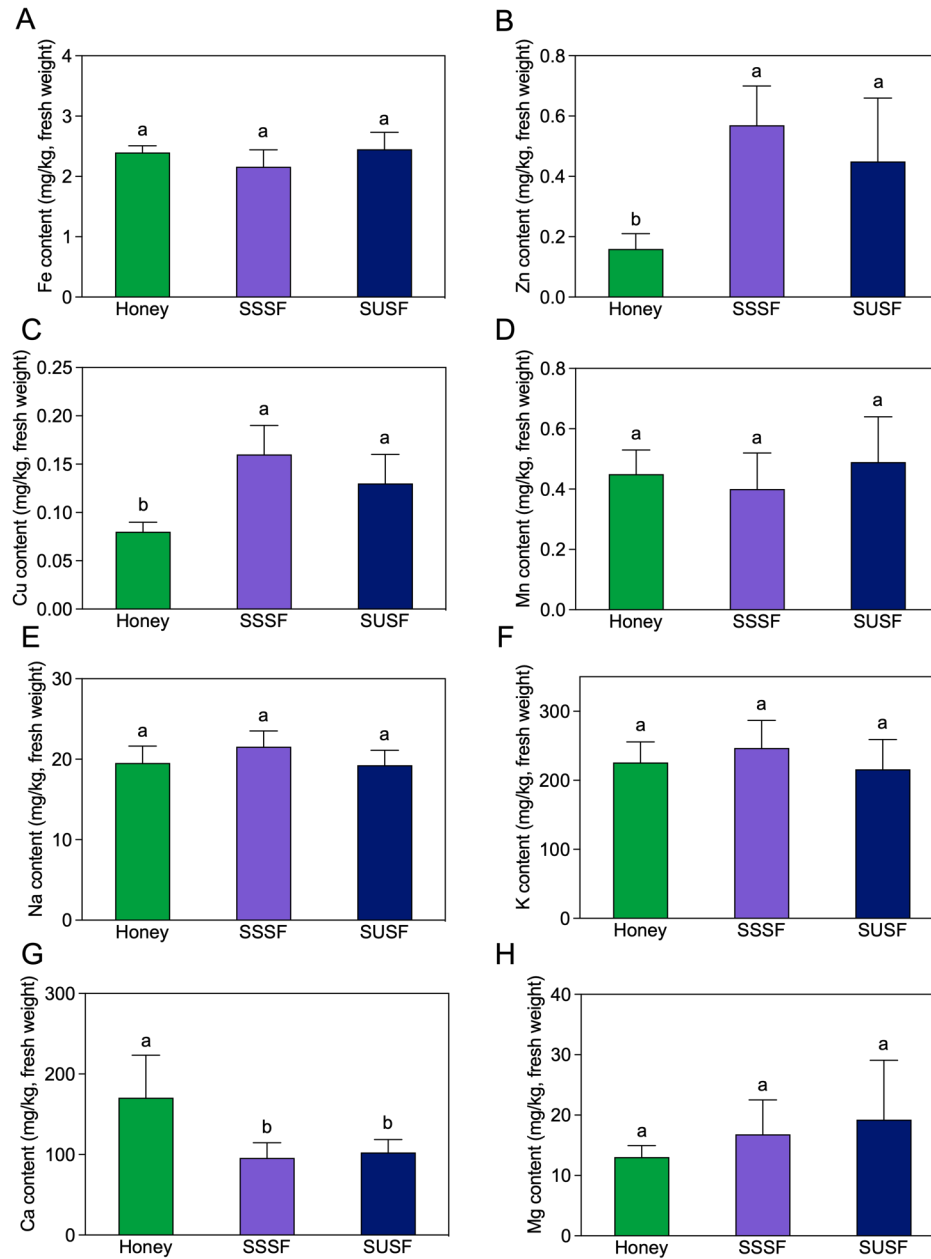

**Figure S2.** Comparison of element contents of stored food obtained from honey-fed and sucrose-fed colonies (mg/kg, fresh weight). Honey, stored food obtained from honey-fed colonies; SSSF, stored food obtained from sealed combs of sucrose-fed colonies; and SUSF, stored food obtained from unsealed combs of sucrose-fed colonies. Values are means  $\pm$  SD. Different lowercase letters indicate significant differences among treatments at the 0.05 level, according to the Tukey's HSD test.
