# Supplementary material for: Effects of Sucrose Feeding on the Quality of Royal Jelly Produced by Honeybee Apis mellifera L.
Source: MDPI journal article supplement (doi:10.3390/insects14090742), 2023-09-04
Supplement: s1 [file s1]

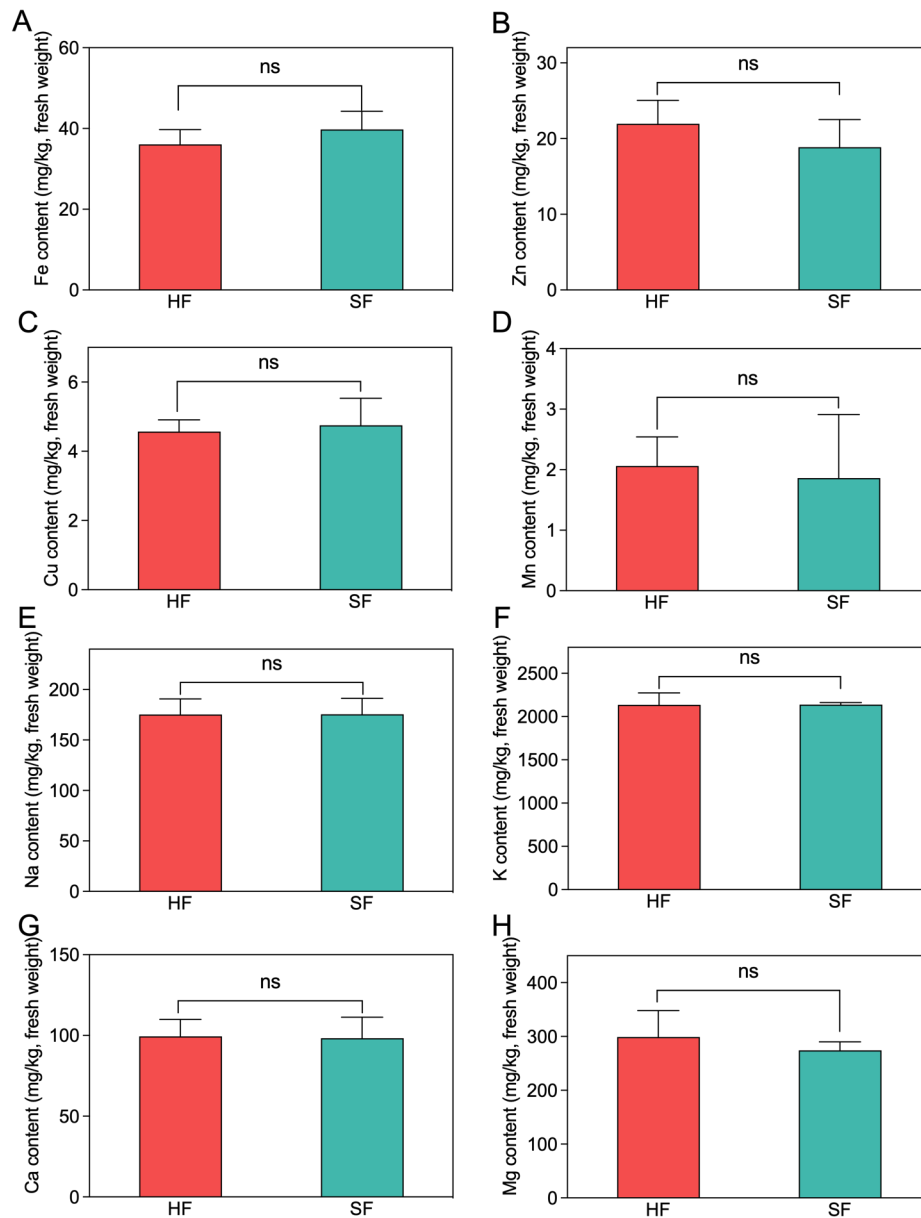

**Figure S1.** Mineral element content of analyzed RJ samples derived from honey feeding and sucrose feeding procedures (mg/kg, fresh weight). HF, honey feeding group; and SF, sucrose feeding group. Values are means  $\pm$  SD. \*\*  $P < 0.01$  by independent samples t-test.
